# Supplementary material for: Linear epitopes of SARS-CoV-2 spike protein elicit neutralizing antibodies in COVID-19 patients
Source: PubMed Central journal article supplement (PMC7475724; doi:10.1038/s41423-020-00523-5), 2020-09-07
Supplement: 41423_2020_523_MOESM1_ESM.pdf [file 41423_2020_523_MOESM1_ESM.pdf]

## Supplementary Information

Linear epitopes of SARS-CoV-2 spike protein elicit  
neutralizing antibodies in COVID-19 patients

*Li, et al*

Table of contents:

### **Materials and Methods**

**Supplementary Fig. 1.** Peptide design and microarray fabrication.

**Supplementary Fig. 2.** Detection of the SARS-CoV-2 specific antibody responses by using the peptide microarray.

**Supplementary Fig. 3.** IgM responses against peptides derived from S protein.

**Supplementary Fig.4.** Correlation analysis among antibody responses against S1 subunit derived epitopes and S1 protein.

**Supplementary Fig.5.** Cross-activity of anti-S2-82 antibodies.

**Supplementary Fig.6.** Epitope-specific antibody depletion from sera.

**Supplementary Table 1** The peptides synthesized in this study

**Supplementary Table 2** Serum samples used in this study

## **Materials and Methods**

### **Peptide synthesis and conjugation with BSA**

The N-terminal amidated peptides were synthesized by GL Biochem, Ltd. (Shanghai, China). Each peptide was individually conjugated with BSA using Sulfo-SMCC (Thermo Fisher Scientific, MA, USA) according to the manufacture's instruction. Briefly, BSA was activated by Sulfo-SMCC in a molar ratio of 1: 30, followed by dialysis in PBS buffer. The peptide with cysteine was added in a w/w ratio of 1:1 and incubated for 2 h, followed by dialysis in PBS to remove free peptides. A few conjugates were randomly selected for examination by SDS-PAGE. For the conjugates of biotin-BSA-peptide, before conjugation, BSA was labelled with biotin by using NHS-LC-Biotin reagent (Thermo Fisher Scientific, MA, USA) with a molar ratio of 1: 5, and then activated by Sulfo-SMCC.

### **Peptide microarray fabrication**

The peptide-BSA conjugates as well as S1 protein, RBD protein and N protein of SARS-CoV-2, along with the negative (BSA) and positive controls (anti-Human IgG and IgM antibody), were printed in triplicate on PATH substrate slide (Grace Bio-Labs, Oregon, USA) to generate identical arrays in a 1 x 7 subarray format using Super Marathon printer (Arrayjet, UK). The microarrays were stored at -80°C until use.

### **Patients and samples**

The Institutional Ethics Review Committee of Foshan Fourth Hospital, Foshan, China approved this study and the written informed consent was obtained from each patient.

COVID-19 patients were hospitalized and received treatment in Foshan Forth hospital during the period from 2020-1-25 to 2020-3-8 with variable stay time (**Supplementary Table 2**). Serum from each patient was collected on the day of hospital discharge when the standard criteria were met according to Diagnosis and Treatment Protocol for Novel Coronavirus Pneumonia (Trial Version 5), released by the National Health Commission & State Administration of Traditional Chinese Medicine. The basic criteria are the same with that in the Diagnosis and Treatment Protocol for Novel Coronavirus Pneumonia (Trial Version 7)<sup>1</sup>. Briefly, the key points of the discharge criteria are: 1) Body temperature is back to normal for more than three days; 2) Respiratory symptoms improve obviously; 3) Pulmonary imaging shows obvious absorption of inflammation; 4) Nuclei acid tests negative twice consecutively on respiratory tract samples such as sputum and nasopharyngeal swabs (sampling interval being at least 24 hours). From 2020-2-28, standard criteria of discharge were modified by adding one item that nuclei acid tests should be negative on anal swab sample. Sera of the control group from Lung cancer patients and healthy donors were collected from Ruijin Hospital, Shanghai, China. All the sera were inactivated at 56 °C for 30 min and stored at -80°C until use.

### **Microarray-based serum analysis**

A 7-chamber rubber gasket was mounted onto each slide to create individual chambers for the 7 identical subarrays. The microarray was used for serum profiling as described previously with minor modifications<sup>2</sup>. Briefly, the arrays stored at -80°C were warmed to room temperature and then incubated in blocking buffer (3% BSA in 1×PBS buffer with 0.1% Tween 20) for 3 h. A total of 400 µL of diluted sera or antibodies was incubated with each subarray for 2 h. The sera were diluted at 1:200 for most samples and for competition experiment, free peptides were added at a concentration of 0.25 mg/mL. For the enriched antibodies, 0.1-0.5 µg antibodies were included in 400 µL

incubation buffer. The arrays were washed with 1×PBST and bound antibodies were detected by incubating with Cy3-conjugated goat anti-human IgG and Alexa Fluor 647-conjugated donkey anti-human IgM (Jackson ImmunoResearch, PA, USA), which were diluted for 1: 1,000 in 1×PBST. The incubation was carried out at room temperature for 1 h. The microarrays were then washed with 1×PBST and dried by centrifugation at room temperature and scanned by LuxScan 10K-A (CapitalBio Corporation, Beijing, China) with the parameters set as 95% laser power/ PMT 550 and 95% laser power/ PMT 480 for IgM and IgG, respectively. The fluorescent intensity was extracted by GenePix Pro 6.0 software (Molecular Devices, CA, USA).

### **Purification of epitope-specific antibodies**

Depends on the availability, 200-500 µL serum from COVID-19 convalescent patient was two-fold diluted in 1×PBS and then pre-incubated with streptavidin beads to eliminate non-specific binding. For each epitope, 100 µg peptides conjugated with biotin-BSA were coated to 100 µL streptavidin magnetic beads (Invitrogen, MA, USA) in 1×PBS buffer at room temperature for 1 h. The protein-coated streptavidin beads were washed 4 times in 1×PBS containing 0.1% BSA, and incubated with the pre-cleaned serum in 1×PBS at 4°C for 4 h. The streptavidin beads were then washed 3 times in 1×PBS containing 0.1% BSA, and eluted with 0.2 M glycine, 1 mM EGTA, pH 2.2. Finally, the antibodies were neutralized with 1M Tris-HCl, pH8.0. The concentration of the purified antibody was monitored by silver staining.

### **Pseudotyped Virus Neutralization**

The neutralization assay was performed as described<sup>3</sup>. Briefly, 293 T cells were co-transfected with expression vectors of pcDNA3.1-SARS-CoV-2-S (encoding SARS-

CoV-2 S protein) and pNL4-3.luc.RE bearing the luciferase reporter-expressing HIV-1 backbone. The supernatants containing SARS-CoV-2 pseudotyped virus were collected 48 h post-transfection. Antibodies or isotype IgG control (Thermo Fisher Scientific, MA, USA) in DMEM supplemented with 10% fetal calf serum were incubated with pseudoviruses at 37°C for 1 h and then the mixtures were added to monolayer Huh-7 cells ( $10^4$  per well in 96-well plates). Twelve h after infection, culture medium was refreshed and then the cells were incubated for an additional 48 h. The luciferase activity was calculated for the detection of relative light units using the Bright-Glo Luciferase Assay System (Promega, WI, USA). Huh-7 cells were subsequently lysed with 50  $\mu$ l lysis reagent (Promega, WI, USA), and 30  $\mu$ l of the lysates were transferred to 96-well Costar flat-bottom luminometer plates (Corning Costar, MA, USA) for the detection of relative light units using the Firefly Luciferase Assay Kit (Promega, WI, USA) and an Ultra 384 luminometer (Tecan, Switzerland).

### **Data analysis and software**

Signal Intensity was defined as the median of the foreground subtracted by the median of background for each spot and then averaged the triplicate spots for each peptide or protein. IgG and IgM data were analyzed separately. Pearson correlation coefficient between two proteins or indicators and the corresponding  $p$  value was calculated by SPSS software under the default parameters. Cluster analysis was performed by pheatmap package in R<sup>4</sup>. To calculate the response frequency of each epitope specific

antibody, mean signal + 3\*SD of the control sera were used to set the threshold. The epitope map was generated by ImmunomeBrowser issued by IEDB (Epitope Prediction and Analysis Tools)<sup>5</sup>. Visualization of the structural details were processed by Pymol (<https://pymol.org/2/>).

## References

1. National Health Commission & National Administration of Traditional Chinese Medicine. Diagnosis and Treatment Protocol for Novel Coronavirus Pneumonia (Trial Version 7). *Chinese medical journal* **133**, 1087–1095 (2020).
2. Li, Y. *et al.* Longitudinal serum autoantibody repertoire profiling identifies surgery-associated biomarkers in lung adenocarcinoma. *EBioMedicine* **53**, 102674 (2020).
3. Wu, Y. *et al.* Identification of Human Single-Domain Antibodies against SARS-CoV-2. *Cell Host & Microbe* (2020). doi:10.1016/j.chom.2020.04.023.
4. R, K. Pheatmap: Pretty Heatmaps. <https://cran.r-project.org/web/packages/pheatmap/index.html> (2015).
5. Dhanda, S. K. *et al.* ImmunomeBrowser: A tool to aggregate and visualize complex and heterogeneous epitopes in reference proteins. *Bioinformatics* **34**, 3931–3933 (2018).

### a. Peptide design and preparation

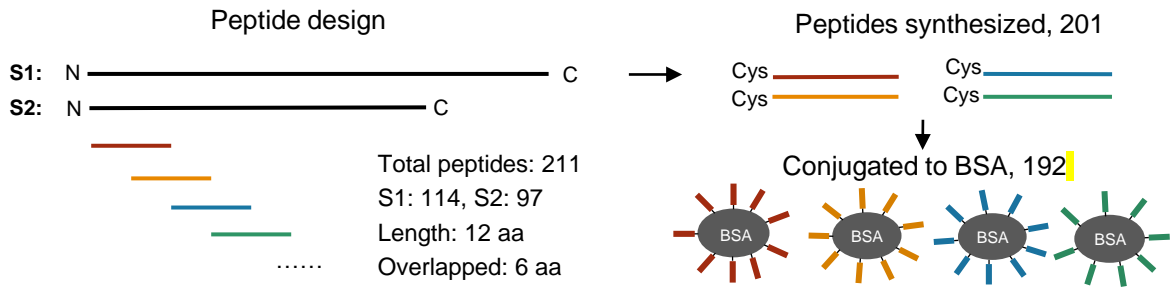

### b. Layout of the peptide microarray

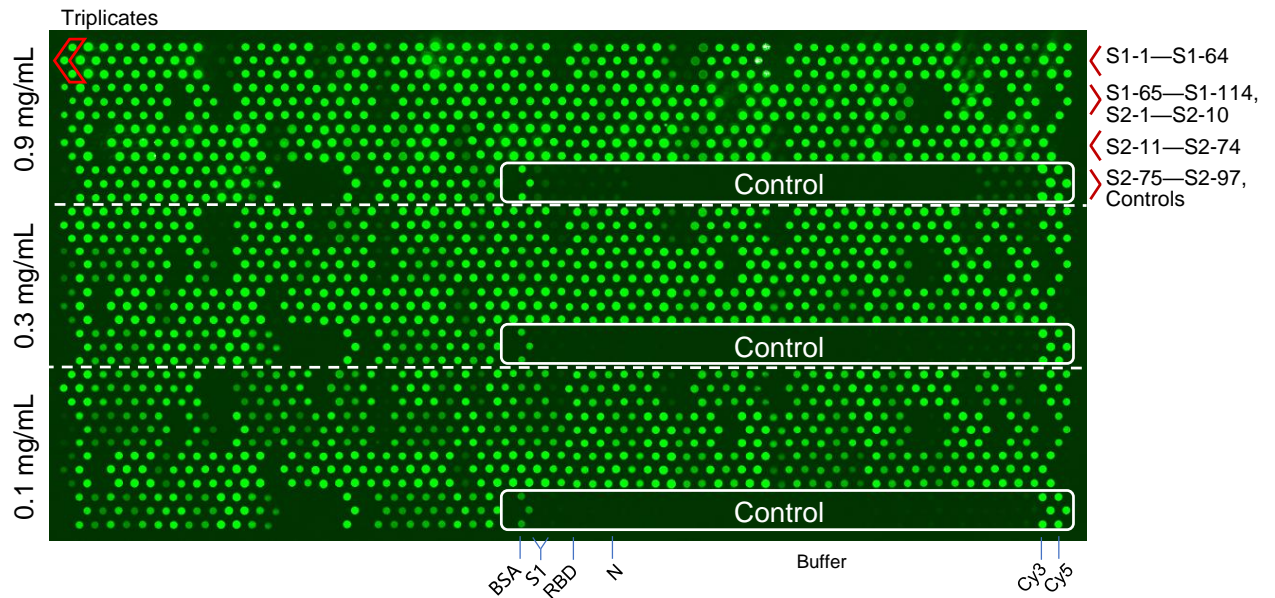

### c. Representative microarray image of COVID-19 patient serum profiling

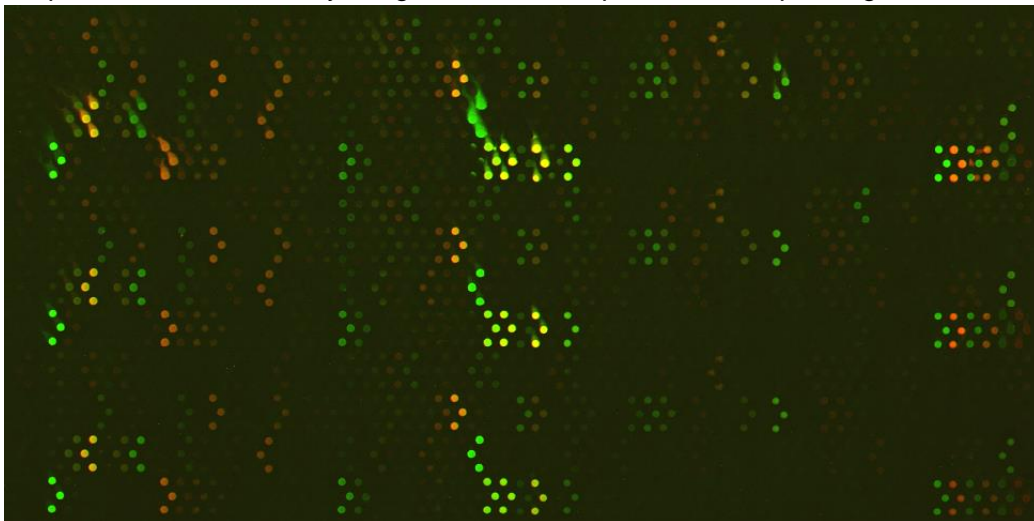

### d. Reproducibility among triplicated spots

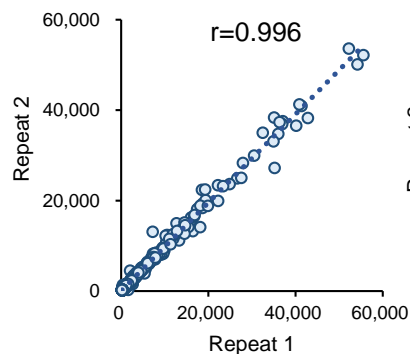

### e. Reproducibility between arrays

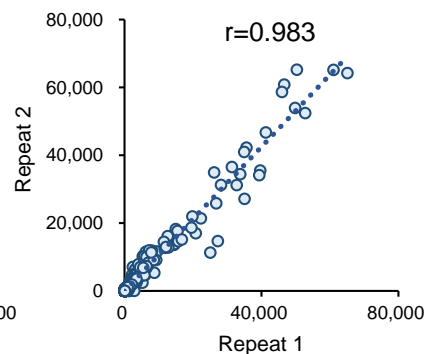

### f. Consistency among different concentrations

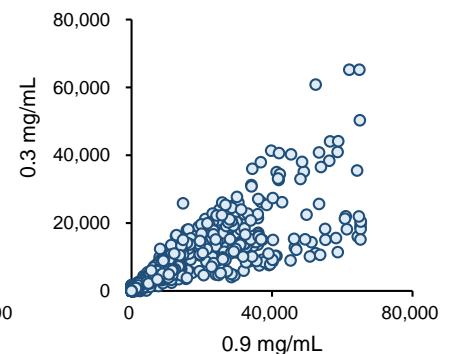

Supplementary Fig. 1. Peptide Design and microarray fabrication

**Supplementary Fig. 1. Peptide design and microarray fabrication.** **a.** Peptide design and conjugation with BSA through the cysteine on the N terminal. The numbers 201 and 192 indicates the peptides that were successfully synthesized and conjugated, respectively. **b.** layout of the peptide microarray. The image was from anti-BSA antibody incubation. Peptides were sequentially printed and the peptides for each row are indicated on the right. **c.** A representative merged image of one COVID-19 serum. IgG response is indicated as green, while IgM is indicated as red. **d-f.** Correlations between repeated spots of the same protein on the same array, repeats arrays and peptide groups with different concentrations.



**a.** Binding kinetics varies among different peptides and their corresponding serum antibodies

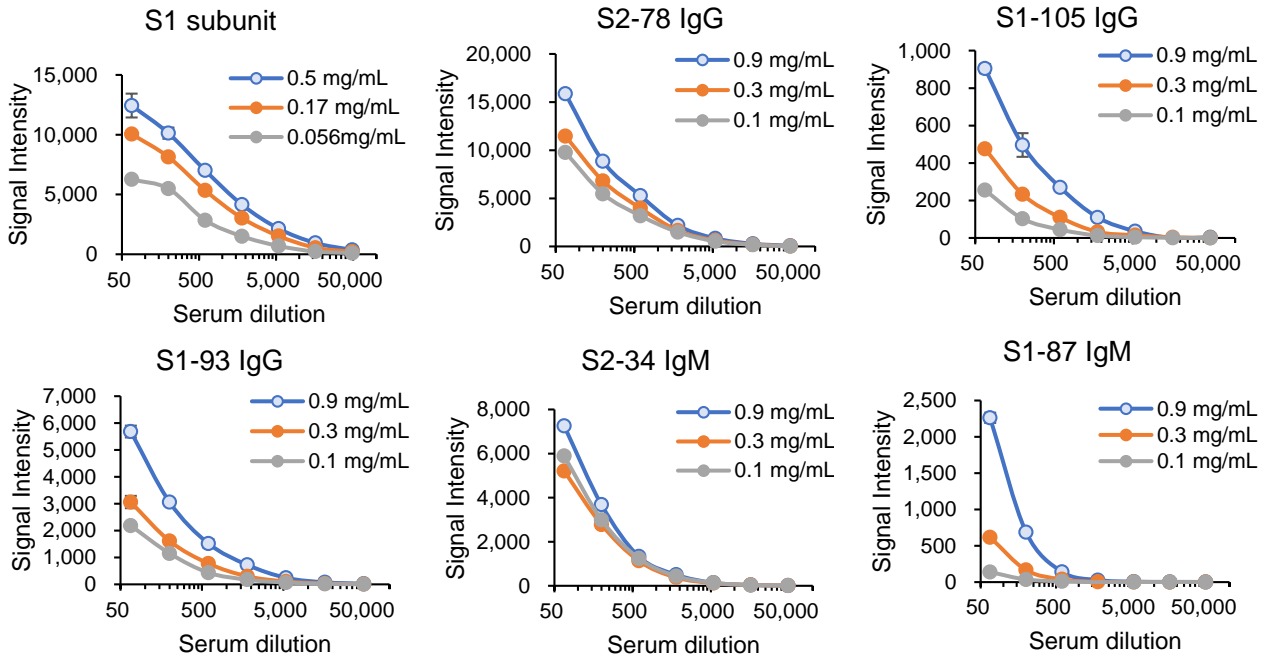

**b.** Competition of the binding by free peptides

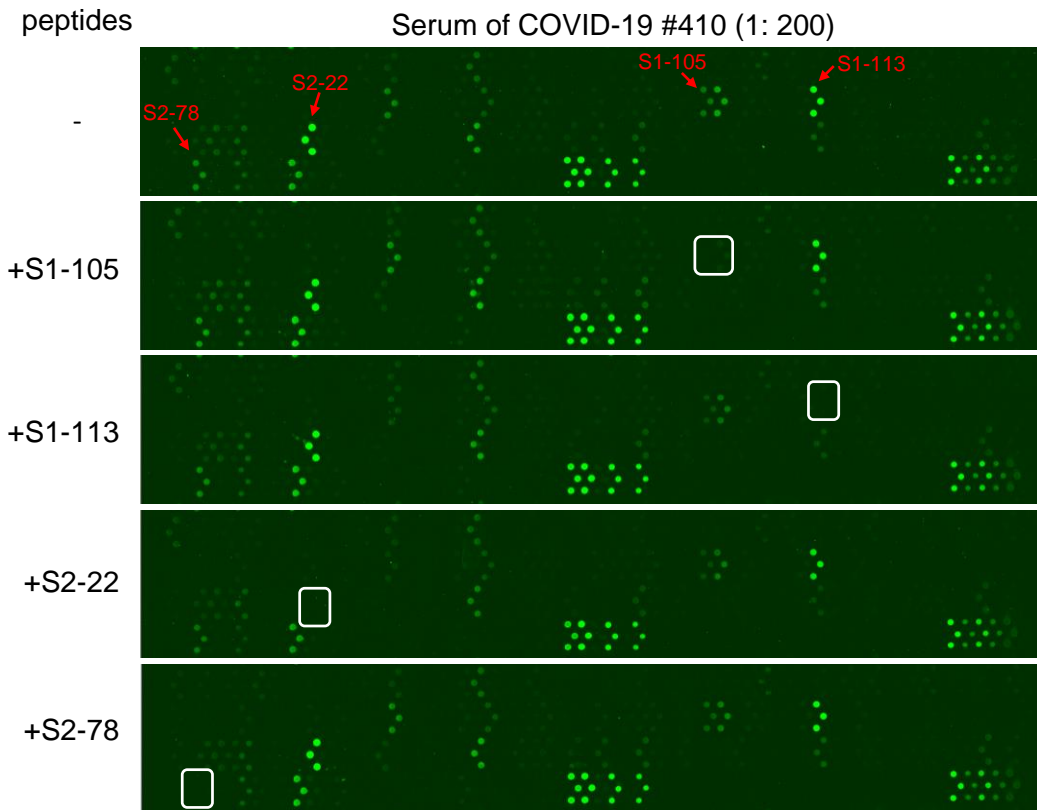

**Supplementary Fig. 2. Detection of the SARS-CoV-2 specific antibody responses by using the peptide microarray.** **a.** Dynamic change of signal intensities for some representative peptides and S1 protein in different concentrations. **b.** Microarray results of the competition assays with the addition of free peptides to the sera. The serum used and the dilution are labeled above. The peptides used for competition are labeled on the left and the red arrows and white rectangles indicate the position of the corresponding peptides.

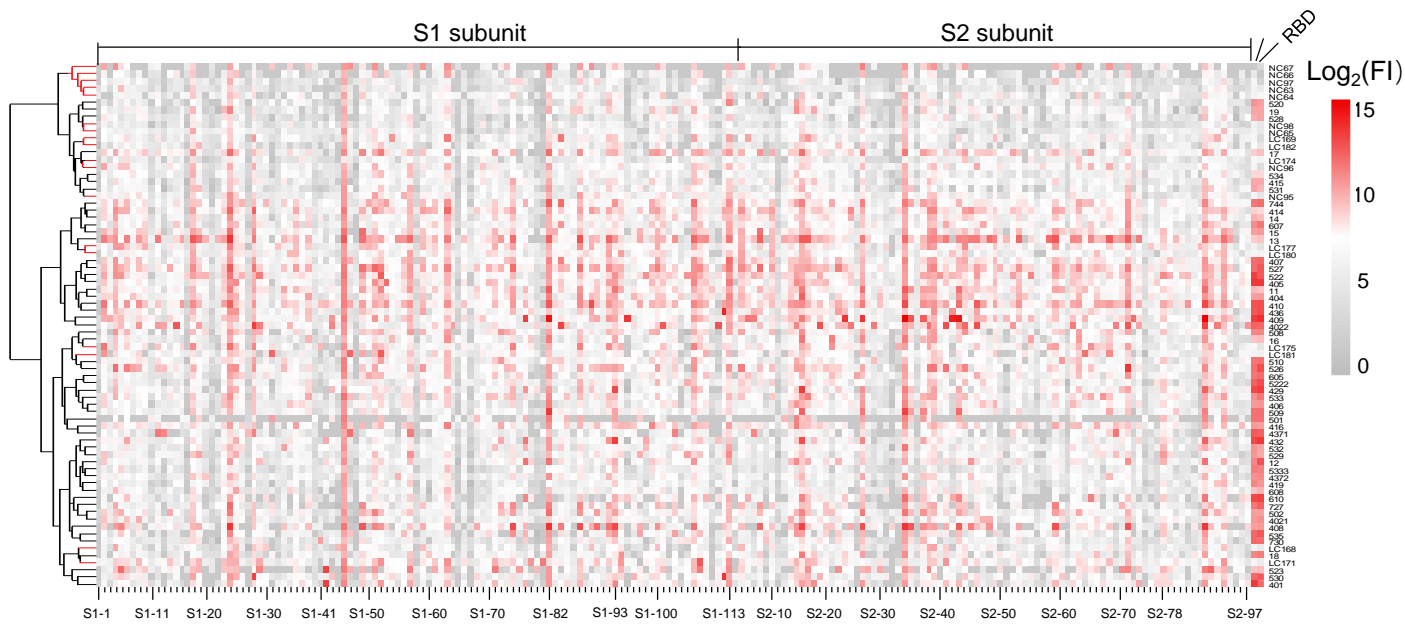

**Supplementary Fig. 3. IgM responses against peptides derived from S protein.** Heatmap of IgM antibody responses of 55 sera from COVID-19 convalescent patients and controls (Healthy donors and Lung cancer patients). Peptides that fully cover S protein were surveyed and S1 protein and RBD were included on the peptide microarray as controls. The peptides were sequentially arranged without clustering. FI, fluorescent intensity.

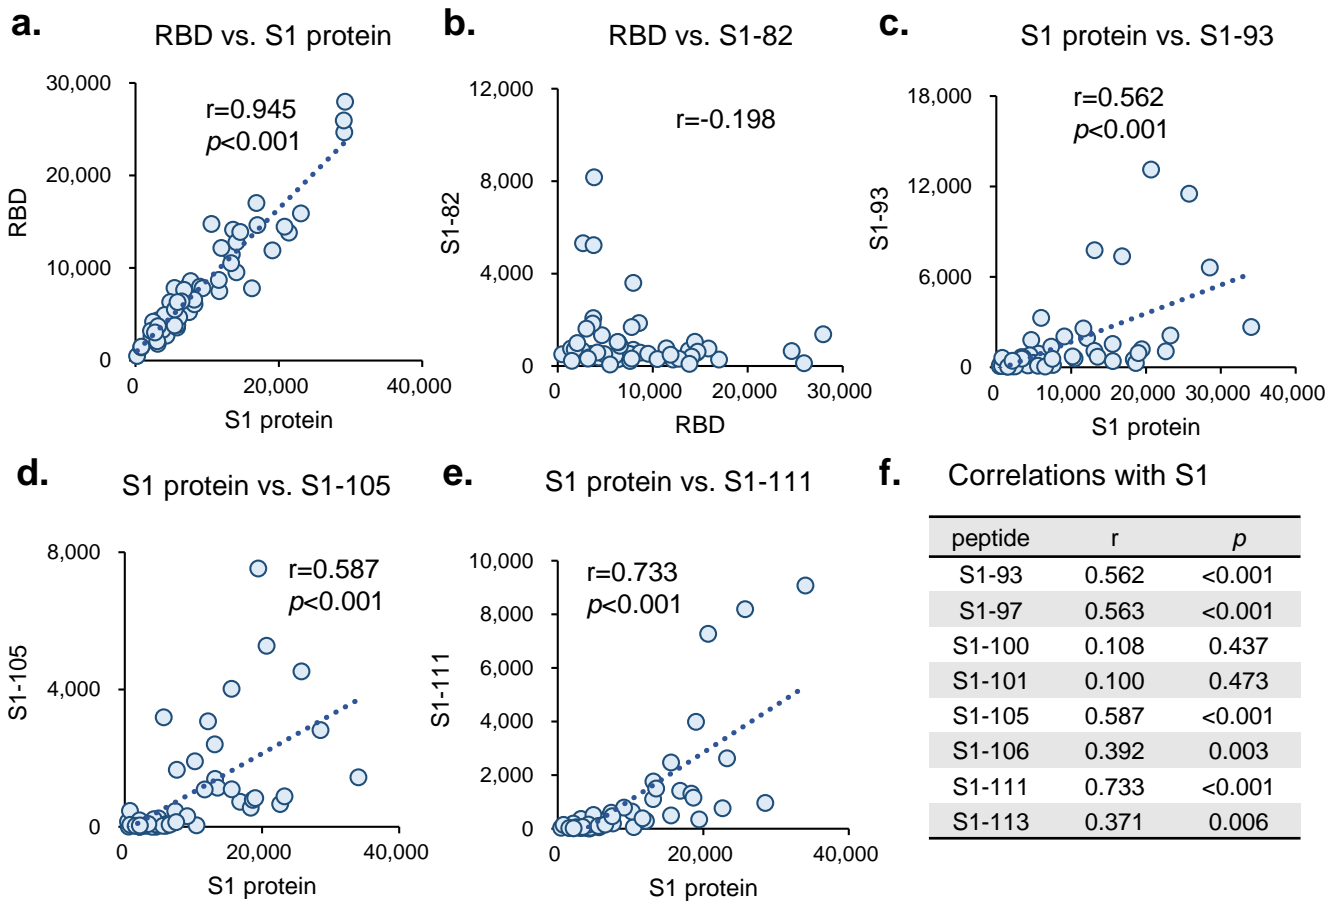

**Supplementary Fig.4. Correlation analysis among antibody responses against S1 subunit derived epitopes and S1 protein.** **a-e.** Correlations of IgG responses between two peptides, proteins or peptide and proteins. **f.** Summary of the correlations of IgG responses between representative peptides and S1 protein.

**a.** S1-82 epitope on spike protein

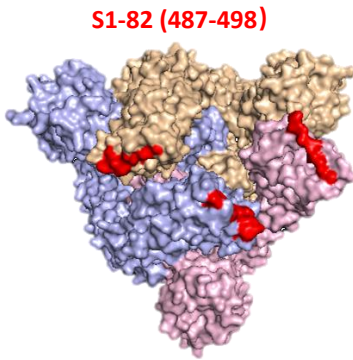

**b.** IgM response

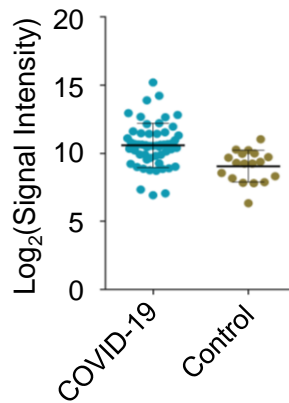

**c.** S1-82 vs. S2-34

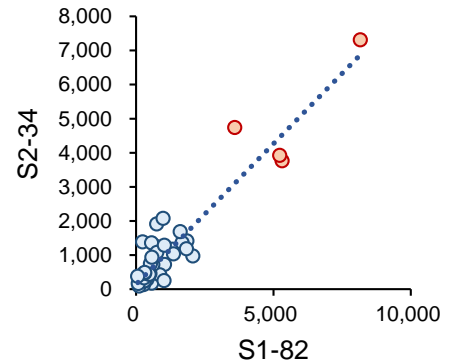

**d.** S1-82 vs. S2-43

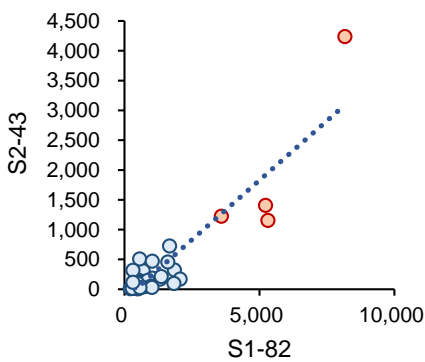

**e.** S1-82 vs. S2-85

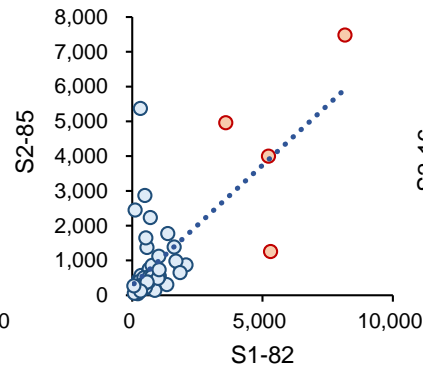

**f.** S1-82 vs. S2-16

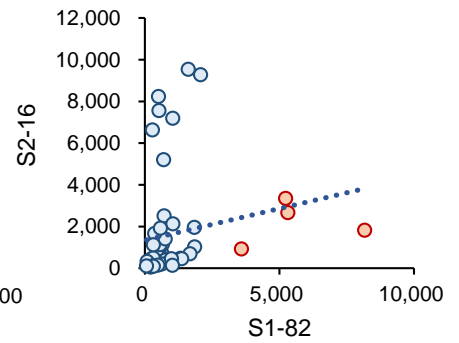

**g.** Sequence similarity to S1-82

S1-82 487 NCYFPLQSYGFQ 498  
S2-34 884 SGWTFGAGAALQ 895  
S2-43 938 LSSTASALGKLQ 949  
S2-85 1190 AKNLNESLIDLQ 1201  
S2-16 776 KNTQEVFAQVKQ 787

**Supplementary Fig.5. Cross-activity of anti-S2-82 antibodies.** **a.** The structural position of S1-82 on S protein (PDB: 6xyb). **b.** IgM responses of S1-82 in COVID-19 patients (blue) and controls (yellow). **c-f.** correlations of IgG responses between S1-82 and other peptides. The red spots were samples with high IgG signals for S1-82. **g.** Sequence similarity among the indicated peptides with S1-82.

**a.** Probe the enriched antibodies on the peptide array

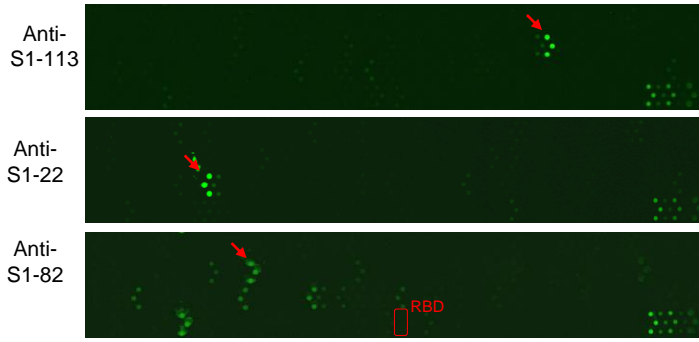

**b.** Layout of the peptide microarray V 2.0

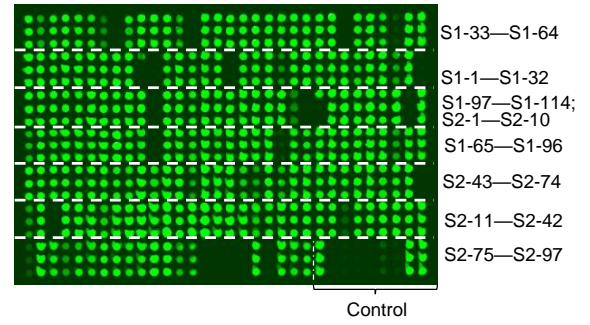

**c.** Comparison of sera before and after depletion of epitope specific antibodies

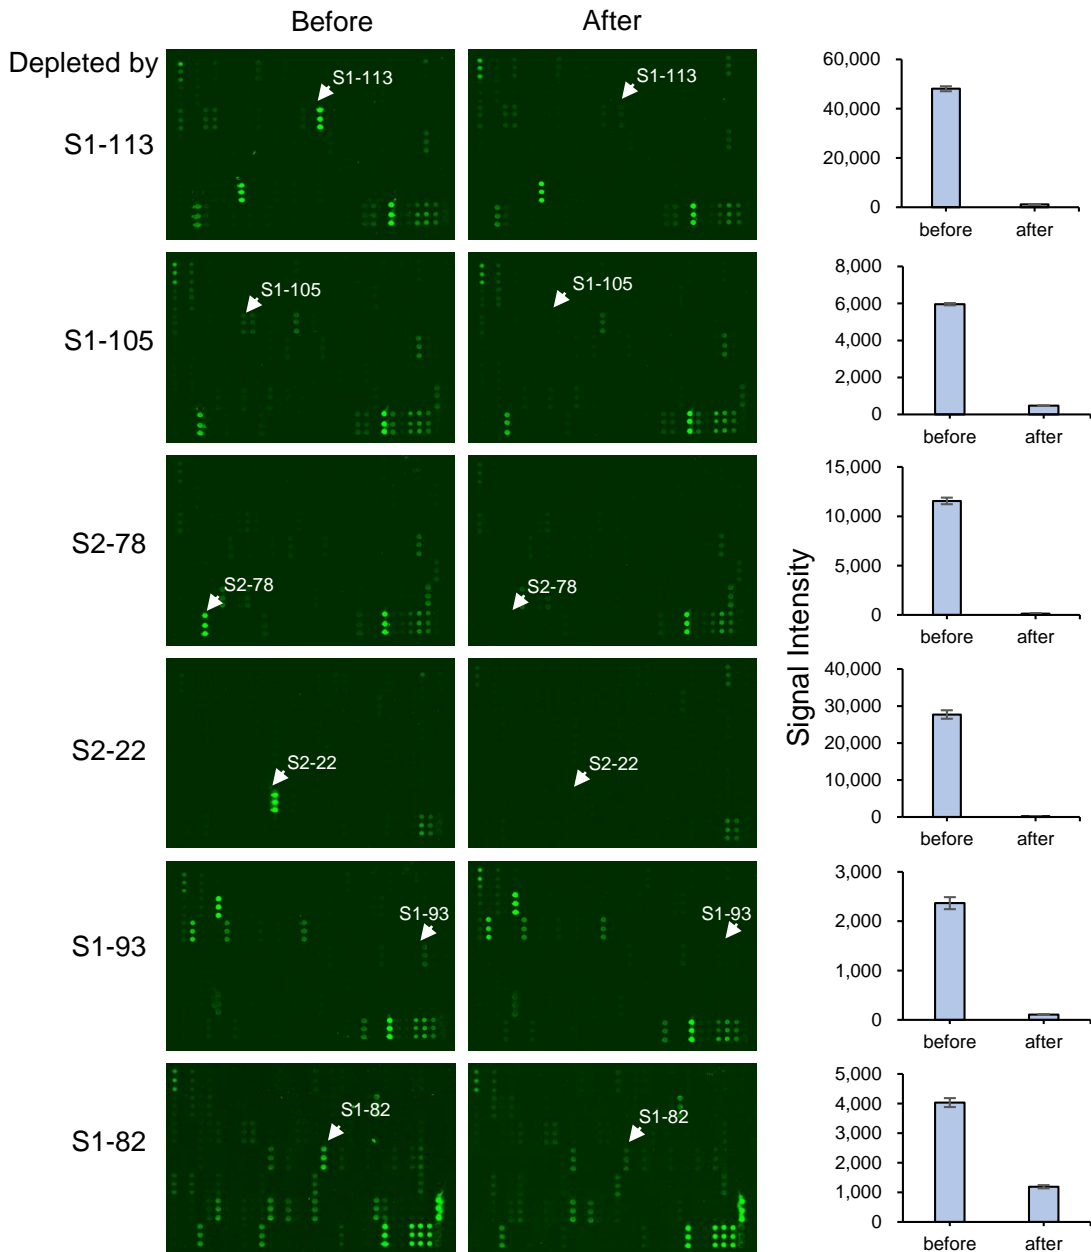

**Supplementary Fig.6. Epitope-specific antibody depletion from sera. a.** Peptide microarray results for epitope-specific antibodies. Red arrows indicate the corresponding peptides. **b.** Layout of the new version of the peptide microarray with 0.3 mg/mL peptides printed. **c.** Representative images (left) and results (right) for comparison of sera between before and after depletion of epitope specific antibodies. The positions of the corresponding peptides labeled on the left that were used for depletion are indicated by arrows.

**Table S1. The peptides synthesized in this study**

| <b>NO.</b> | <b>Peptide ID</b> | <b>Sart Position</b> | <b>Amino acid sequence</b> | <b>End Position</b> | <b>Note</b> |
|------------|-------------------|----------------------|----------------------------|---------------------|-------------|
| 1          | S1-1              | 1                    | MFVFLVLLPLVS               | 12                  |             |
| 2          | S1-2              | 7                    | LLPLVSSQCVNL               | 18                  |             |
| 3          | S1-3              | 13                   | SQCVNLTTRTQL               | 24                  |             |
| 4          | S1-4              | 19                   | TTRTQLPPAYTN               | 30                  |             |
| 5          | S1-5              | 25                   | PPAYTNSFTRGV               | 36                  |             |
| 6          | S1-6              | 31                   | SFTRGVYYPDKV               | 42                  |             |
| 7          | S1-7              | 37                   | YYPDKVFRSSVL               | 48                  |             |
| 8          | S1-8              | 43                   | FRSSVLHSTQDL               | 54                  |             |
| 9          | S1-9              | 49                   | HSTQDLFLPFFS               | 60                  |             |
| 10         | S1-10             | 55                   | FLPFFSNVTWFH               | 66                  | Insoluble   |
| 11         | S1-11             | 61                   | NVTWFHAIHVSG               | 72                  |             |
| 12         | S1-12             | 67                   | AIHVSGTNGTKR               | 78                  |             |
| 13         | S1-13             | 73                   | TNGTKRFDNPVL               | 84                  |             |
| 14         | S1-14             | 79                   | FDNPVLPFNDGV               | 90                  |             |
| 15         | S1-15             | 85                   | PFNDGVYFASTE               | 96                  |             |
| 16         | S1-16             | 91                   | YFASTEKSNIIR               | 102                 |             |
| 17         | S1-17             | 97                   | KSNIIRGWIFGT               | 108                 |             |
| 18         | S1-18             | 103                  | GWIFGTTLDSKT               | 114                 |             |
| 19         | S1-19             | 109                  | TLDSKTQSLIV                | 120                 |             |
| 20         | S1-20             | 115                  | QSLIVNNATNV                | 126                 |             |
| 21         | S1-21             | 121                  | NNATNVVIKVCE               | 132                 |             |
| 22         | S1-22             | 127                  | VIKVCEFCQFCND              | 138                 |             |
| 23         | S1-23             | 133                  | FQFCNDPFLGVY               | 144                 |             |
| 24         | S1-24             | 139                  | PFLGVYYHKNNK               | 150                 |             |
| 25         | S1-25             | 145                  | YHKNNKSWMESE               | 156                 |             |
| 26         | S1-26             | 151                  | SWMESEFRVYSS               | 162                 |             |
| 27         | S1-27             | 157                  | FRVYSSANNCTF               | 168                 |             |
| 28         | S1-28             | 163                  | ANNCTFEYVSQP               | 174                 |             |
| 29         | S1-29             | 169                  | EYVSQPFMLDLE               | 180                 |             |
| 30         | S1-30             | 175                  | FLMDLEGKQGNF               | 186                 |             |
| 31         | S1-31             | 181                  | GKQGNFKNLREF               | 192                 |             |
| 32         | S1-32             | 187                  | KNLREFVFKNID               | 198                 | Insoluble   |
| 33         | S1-33             | 193                  | VFKNIDGYFKIY               | 204                 |             |
| 34         | S1-34             | 199                  | GYFKIYSKHTPI               | 210                 |             |
| 35         | S1-35             | 205                  | SKHTPINLVRDL               | 216                 |             |
| 36         | S1-36             | 211                  | NLVRDLPQGFS                | 222                 |             |
| 37         | S1-37             | 217                  | PQGFSALEPLVD               | 228                 |             |
| 38         | S1-38             | 223                  | LEPLVDLPIGIN               | 234                 |             |
| 39         | S1-39             | 229                  | LPIGINITRFQT               | 240                 |             |
| 40         | S1-40             | 235                  | ITRFQTLALHR                | 246                 | Insoluble   |
| 41         | S1-41             | 241                  | LLALHRSYLTPG               | 252                 |             |
| 42         | S1-42             | 247                  | SYLTPGDSSSGW               | 258                 |             |
| 43         | S1-43             | 253                  | DSSSGWTAGAAA               | 264                 |             |
| 44         | S1-44             | 259                  | TAGAAAYYVGYL               | 270                 |             |
| 45         | S1-45             | 265                  | YYVGYLQPRTFL               | 276                 |             |
| 46         | S1-46             | 271                  | QPRTFLLKYNEN               | 282                 | Insoluble   |
| 47         | S1-47             | 277                  | LKYNENGTITDA               | 288                 |             |
| 48         | S1-48             | 283                  | GTITDAVDCALD               | 294                 |             |
| 49         | S1-49             | 289                  | VDCALDPLSETK               | 300                 |             |
| 50         | S1-50             | 295                  | PLSETKCTLKSF               | 306                 |             |
| 51         | S1-51             | 301                  | CTLKSFTVEKGI               | 312                 |             |
| 52         | S1-52             | 307                  | TVEKGIYQTSNF               | 318                 |             |
| 53         | S1-53             | 313                  | YQTSNFRVQPTE               | 324                 |             |
| 54         | S1-54             | 319                  | RVQPTEIVRFP                | 330                 |             |
| 55         | S1-55             | 325                  | SIVRFPNITNLC               | 336                 |             |
| 56         | S1-56             | 331                  | NITNLCPFGEVF               | 342                 |             |
| 57         | S1-57             | 337                  | PFGEVFNATRFA               | 348                 |             |
| 58         | S1-58             | 343                  | NATRFASVYAWN               | 354                 |             |
| 59         | S1-59             | 349                  | SVYAWNRRKRISN              | 360                 |             |
| 60         | S1-60             | 355                  | RKRISNCVADYS               | 366                 |             |
| 61         | S1-61             | 361                  | CVADYSVLYNSA               | 372                 |             |
| 62         | S1-62             | 367                  | VLYNSASFSTFK               | 378                 |             |
| 63         | S1-63             | 373                  | SFSTFKCYGVSP               | 384                 |             |
| 64         | S1-64             | 379                  | CYGVSPTKLNDL               | 390                 |             |
| 65         | S1-65             | 385                  | TKLNDLCFTNVY               | 396                 |             |
| 66         | S1-66             | 391                  | CFTNVYADSFVI               | 402                 |             |
| 67         | S1-67             | 397                  | ADSFVIRGDEV                | 408                 |             |
| 68         | S1-68             | 403                  | RGDEVQRQIAPGQ              | 414                 |             |
| 69         | S1-69             | 409                  | QIAPGQTGKIAD               | 420                 |             |
| 70         | S1-70             | 415                  | TGKIADYNYKLP               | 426                 |             |
| 71         | S1-71             | 421                  | YNYKLPDDFTGC               | 432                 |             |

|     |        |     |               |     |                       |
|-----|--------|-----|---------------|-----|-----------------------|
| 72  | S1-72  | 427 | DDFTGCVIAWNS  | 438 | Failure for synthesis |
| 73  | S1-73  | 433 | VIAWNSNNLDSK  | 444 |                       |
| 74  | S1-74  | 439 | NNLDSKVGGNYN  | 450 |                       |
| 75  | S1-75  | 445 | VGGNYNYLYRLF  | 456 | Insoluble             |
| 76  | S1-76  | 451 | YLYRLFRKSNLK  | 462 |                       |
| 77  | S1-77  | 457 | RKSNLKPFERDI  | 468 |                       |
| 78  | S1-78  | 463 | PFERDISTEIYQ  | 474 |                       |
| 79  | S1-79  | 469 | STEIYQAGSTPC  | 480 |                       |
| 80  | S1-80  | 475 | AGSTPCNGVEGF  | 486 |                       |
| 81  | S1-81  | 481 | NGVEGFNCYFPL  | 492 |                       |
| 82  | S1-82  | 487 | NCYFPLQSYGFQ  | 498 |                       |
| 83  | S1-83  | 493 | QSYGFQPTNGVG  | 504 |                       |
| 84  | S1-84  | 499 | PTNGVGYQPYRV  | 510 |                       |
| 85  | S1-85  | 505 | YQPYRVVLSFE   | 516 |                       |
| 86  | S1-86  | 511 | VVLSFELLHAPA  | 522 |                       |
| 87  | S1-87  | 517 | LLHAPATVCGPK  | 528 |                       |
| 88  | S1-88  | 523 | TVCGPKKSTNLV  | 534 |                       |
| 89  | S1-89  | 529 | KSTNLVKNKCVN  | 540 |                       |
| 90  | S1-90  | 535 | KNKCVNFNENGL  | 546 |                       |
| 91  | S1-91  | 541 | FNFNGLTGTGVL  | 552 |                       |
| 92  | S1-92  | 547 | TGTGVLTESNKK  | 558 |                       |
| 93  | S1-93  | 553 | TESNKKFLPFQQ  | 564 |                       |
| 94  | S1-94  | 559 | FLPFQQFGRDIA  | 570 |                       |
| 95  | S1-95  | 565 | FGRDIADTTDAV  | 576 |                       |
| 96  | S1-96  | 571 | DTTDAVRDPQTL  | 582 |                       |
| 97  | S1-97  | 577 | RDPQTLEILDIT  | 588 |                       |
| 98  | S1-98  | 583 | EILDITPCSFEGG | 594 |                       |
| 99  | S1-99  | 589 | PCSFEGGVSITP  | 600 |                       |
| 100 | S1-100 | 595 | VSVITPGTNTSN  | 606 |                       |
| 101 | S1-101 | 601 | GTNTSNQVAVLY  | 612 |                       |
| 102 | S1-102 | 607 | QVAVLYQDVNCT  | 618 |                       |
| 103 | S1-103 | 613 | QDVNCTEVPVAI  | 624 |                       |
| 104 | S1-104 | 619 | EVPVAIHADQLT  | 630 |                       |
| 105 | S1-105 | 625 | HADQLTPTWRVY  | 636 |                       |
| 106 | S1-106 | 631 | PTWRVYSTGSNV  | 642 |                       |
| 107 | S1-107 | 637 | STGSNVFQTRAG  | 648 | Insoluble             |
| 108 | S1-108 | 643 | FQTRAGCLIGAE  | 654 |                       |
| 109 | S1-109 | 649 | CLIGAEHVNNNSY | 660 |                       |
| 110 | S1-110 | 655 | HVNNNSYECDIPI | 666 |                       |
| 111 | S1-111 | 661 | ECDIPIGAGICA  | 672 |                       |
| 112 | S1-112 | 667 | GAGICASYQTQT  | 678 |                       |
| 113 | S1-113 | 673 | SYQTQTNPPRA   | 684 |                       |
| 114 | S1-114 | 679 | NSPPRRARGGGGS | 685 |                       |
| 115 | S2-1   | 686 | SVASQSIAYTM   | 697 | Insoluble             |
| 116 | S2-2   | 692 | IIAYTMSLGAEN  | 703 | Failure for synthesis |
| 117 | S2-3   | 698 | SLGAENSVAYSN  | 709 |                       |
| 118 | S2-4   | 704 | SVAYSNNNSIAIP | 715 |                       |
| 119 | S2-5   | 710 | NSIAIPTNFTIS  | 721 |                       |
| 120 | S2-6   | 716 | TNFTISVTTEIL  | 727 | Failure for synthesis |
| 121 | S2-7   | 722 | VTTEILPVSMTK  | 733 |                       |
| 122 | S2-8   | 728 | PVSMTKTSVDCT  | 739 |                       |
| 123 | S2-9   | 734 | TSVDCTMYICGD  | 745 | Failure for synthesis |
| 124 | S2-10  | 740 | MYICGDSTECNS  | 751 |                       |
| 125 | S2-11  | 746 | STECNSLLLQYG  | 757 |                       |
| 126 | S2-12  | 752 | LLLQYGSFCTQL  | 763 |                       |
| 127 | S2-13  | 758 | SFCTQLNRALTG  | 769 | Insoluble             |
| 128 | S2-14  | 764 | NRALTGIAVEQD  | 775 |                       |
| 129 | S2-15  | 770 | IAVEQDKNTQEV  | 781 |                       |
| 130 | S2-16  | 776 | KNTQEVFAQVKQ  | 787 |                       |
| 131 | S2-17  | 782 | FAQVKQIYKTPP  | 793 |                       |
| 132 | S2-18  | 788 | IYKTPPIKDFGG  | 799 |                       |
| 133 | S2-19  | 794 | IKDFGGFNFSQI  | 805 |                       |
| 134 | S2-20  | 800 | FNFSQILPDPSK  | 811 |                       |
| 135 | S2-21  | 806 | LPDPSKPSKRSF  | 817 |                       |
| 136 | S2-22  | 812 | PSKRSFIEDLLF  | 823 |                       |
| 137 | S2-23  | 818 | IEDLLFNKVTLA  | 829 |                       |
| 138 | S2-24  | 824 | NKVTLADAGFIK  | 835 | Failure for synthesis |
| 139 | S2-25  | 830 | DAGFIKQYGDCL  | 841 |                       |
| 140 | S2-26  | 836 | QYGDCLGDIAAR  | 847 |                       |
| 141 | S2-27  | 842 | GDIAARDLICAQ  | 853 |                       |
| 142 | S2-28  | 848 | DLICAQKFNGLT  | 859 |                       |
| 143 | S2-29  | 854 | KFNGLTVLPPLL  | 865 |                       |
| 144 | S2-30  | 860 | VLPPLLTDemia  | 871 |                       |
| 145 | S2-31  | 866 | TDEMIAQYTSAL  | 877 |                       |



|     |       |      |               |      |                       |
|-----|-------|------|---------------|------|-----------------------|
| 146 | S2-32 | 872  | QYTSALLAGTIT  | 883  |                       |
| 147 | S2-33 | 878  | LAGTITSGWTFG  | 889  |                       |
| 148 | S2-34 | 884  | SGWTFGAGAALQ  | 895  |                       |
| 149 | S2-35 | 890  | AGAALQIPFAMQ  | 901  |                       |
| 150 | S2-36 | 896  | IPFAMQMAYRFN  | 907  |                       |
| 151 | S2-37 | 902  | MAYRFNGIGVTQ  | 913  |                       |
| 152 | S2-38 | 908  | GIGVTQNVLYEN  | 919  |                       |
| 153 | S2-39 | 914  | NVLYENQKLIAN  | 925  |                       |
| 154 | S2-40 | 920  | QKLIANQFNSAI  | 931  |                       |
| 155 | S2-41 | 926  | QFNSAIGKIQDS  | 937  |                       |
| 156 | S2-42 | 932  | GKIQDSLSSSTAS | 943  |                       |
| 157 | S2-43 | 938  | LSSTASALGKLQ  | 949  |                       |
| 158 | S2-44 | 944  | ALGKLQDVVNQN  | 955  |                       |
| 159 | S2-45 | 950  | DVVNQNAQALNT  | 961  |                       |
| 160 | S2-46 | 956  | AQALNTLVKQLS  | 967  |                       |
| 161 | S2-47 | 962  | LVKQLSSNFGAI  | 973  |                       |
| 162 | S2-48 | 968  | SNFGAISSVLND  | 979  |                       |
| 163 | S2-49 | 974  | SSVLNDILSRLD  | 985  |                       |
| 164 | S2-50 | 980  | ILSRLDKVEAEV  | 991  |                       |
| 165 | S2-51 | 986  | KVEAEVQIDRLI  | 997  |                       |
| 166 | S2-52 | 992  | QIDRLITGRLQS  | 1003 |                       |
| 167 | S2-53 | 998  | TGRLQSLQTYVT  | 1009 |                       |
| 168 | S2-54 | 1004 | LQTYVTQQLIRA  | 1015 |                       |
| 169 | S2-55 | 1010 | QQLIRAAEIRAS  | 1021 |                       |
| 170 | S2-56 | 1016 | AEIRASANLAAT  | 1027 |                       |
| 171 | S2-57 | 1022 | ANLAATKMSECV  | 1033 |                       |
| 172 | S2-58 | 1028 | KMSECVLGQSKR  | 1039 |                       |
| 173 | S2-59 | 1034 | LGQSKRVDFCGK  | 1045 |                       |
| 174 | S2-60 | 1040 | VDFCGKGYHLMS  | 1051 |                       |
| 175 | S2-61 | 1046 | GYHLMSFPQSAP  | 1057 |                       |
| 176 | S2-62 | 1052 | FPQSAPHGVVFL  | 1063 |                       |
| 177 | S2-63 | 1058 | HGVVFLHVITYVP | 1069 |                       |
| 178 | S2-64 | 1064 | HVTYVPAQEKNF  | 1075 |                       |
| 179 | S2-65 | 1070 | AQEKNFTTAPAI  | 1081 |                       |
| 180 | S2-66 | 1076 | TTAPAICHDGKA  | 1087 |                       |
| 181 | S2-67 | 1082 | CHDGKAHFPREG  | 1093 |                       |
| 182 | S2-68 | 1088 | HFPREGVFSVNG  | 1099 |                       |
| 183 | S2-69 | 1094 | VFVSNGTHWVFT  | 1105 |                       |
| 184 | S2-70 | 1100 | THWVFTQRNFYE  | 1111 |                       |
| 185 | S2-71 | 1106 | QRNFYEPQIITT  | 1117 |                       |
| 186 | S2-72 | 1112 | PQIITDNTFVS   | 1123 |                       |
| 187 | S2-73 | 1118 | DNTFVSGNCDVV  | 1129 |                       |
| 188 | S2-74 | 1124 | GNCDVVIQVNN   | 1135 | Failure for synthesis |
| 189 | S2-75 | 1130 | IGIVNNTVYDPL  | 1141 |                       |
| 190 | S2-76 | 1136 | TVYDPLQPELDS  | 1147 |                       |
| 191 | S2-77 | 1142 | QPELDSFKEELD  | 1153 |                       |
| 192 | S2-78 | 1148 | FKEELDKYFKNH  | 1159 |                       |
| 193 | S2-79 | 1154 | KYFKNHTSPDVD  | 1165 |                       |
| 194 | S2-80 | 1160 | TSPDVDLGDISG  | 1171 |                       |
| 195 | S2-81 | 1166 | LGDISGINASVV  | 1177 |                       |
| 196 | S2-82 | 1172 | INASVVNIQKEI  | 1183 |                       |
| 197 | S2-83 | 1178 | NIQKEIDRLNEV  | 1189 |                       |
| 198 | S2-84 | 1184 | DRLNEVAKNLNE  | 1195 |                       |
| 199 | S2-85 | 1190 | AKNLNESLIDLQ  | 1201 |                       |
| 200 | S2-86 | 1196 | SLIDLQELGKYE  | 1207 |                       |
| 201 | S2-87 | 1202 | ELGKYEQYIKWP  | 1213 |                       |
| 202 | S2-88 | 1208 | QYIKWPWYIWLG  | 1219 |                       |
| 203 | S2-89 | 1214 | WYIWLGFIAGLI  | 1225 | Failure for synthesis |
| 204 | S2-90 | 1220 | FIAGLIAIVMVT  | 1231 | Failure for synthesis |
| 205 | S2-91 | 1226 | AIVMVTIMLCCM  | 1237 | Failure for synthesis |
| 206 | S2-92 | 1232 | IMLCCMTSCCSC  | 1243 | Failure for synthesis |
| 207 | S2-93 | 1238 | TSCCCLKGCCS   | 1249 |                       |
| 208 | S2-94 | 1244 | LKGCCSCGSCCK  | 1255 | Insoluble             |
| 209 | S2-95 | 1250 | CGSCCKFDEDDS  | 1261 |                       |
| 210 | S2-96 | 1256 | FDEDDSEPVKLG  | 1267 |                       |
| 211 | S2-97 | 1262 | EPVLKGVKLHYT  | 1273 |                       |

**Table S2.** Serum samples used in this study

| <b>COVID-19 patient group</b> |                | <b>n=55</b> |
|-------------------------------|----------------|-------------|
| Gender                        | Male           | 27          |
|                               | Female         | 28          |
| Age                           |                | 41.5±14.9   |
| Severity                      | mild cases     | 8           |
|                               | moderate cases | 47          |
| Days after onset              |                | 27.5±7.7    |
| hospital stay (days)          |                | 14.0±5.6    |
| <b>Control group</b>          |                | <b>n=18</b> |
| Lung cancer patients (LC)     |                | 9           |
| Health control (HC)           |                | 9           |
| Gender                        | Male           | 8           |
|                               | Female         | 10          |
| Age                           |                | 50.4±12.5   |
| Sample collection (year)      |                | 2017-2018   |
